# Supplementary material for: Amount and Type of Dietary Fat, Postprandial Glycemia, and Insulin Requirements in Type 1 Diabetes: A Randomized Within-Subject Trial
Source: Oxford University Press journal article supplement (doi:10.2337/dc19-0687), 2019-08-27

SUPPLEMENTARY DATA

**Supplementary Table 1.** Nutrition Information

| <b>Meal</b>  | <b>Ingredients</b>                          | <b>Energy (kJ)</b>   | <b>CHO (g)</b>      | <b>Protein (g)</b>  | <b>Total Fat (g)</b> | <b>SFA (g)</b>       | <b>MUFA (g)</b> | <b>PUFA (g)</b> |
|--------------|---------------------------------------------|----------------------|---------------------|---------------------|----------------------|----------------------|-----------------|-----------------|
| 0g Fat       | 89.5g Pane Di Casa Bread                    | 984                  | 45.0                | 7.8                 | 1.7                  | 0.2                  | unknown         | unknown         |
| 20g Fat/MUFA | 89.5g Pane Di Casa Bread<br>94.3g Avocado   | 1791<br><i>+807</i>  | 45.6<br><i>+0.6</i> | 9.7<br><i>+1.9</i>  | 21.7<br><i>+20.0</i> | 5.0<br><i>+4.8</i>   | <i>+11.5</i>    | <i>+2.6</i>     |
| 40g Fat      | 89.5g Pane Di Casa Bread<br>188.7g Avocado  | 2597<br><i>+1613</i> | 46.1<br><i>+1.1</i> | 11.6<br><i>+3.8</i> | 41.7<br><i>+40.0</i> | 9.8<br><i>+9.6</i>   | <i>+23.0</i>    | <i>+5.3</i>     |
| 60g Fat      | 89.5g Pane Di Casa Bread<br>283.0g Avocado  | 3404<br><i>+2420</i> | 46.7<br><i>+1.7</i> | 13.4<br><i>+5.6</i> | 61.7<br><i>+60.0</i> | 14.6<br><i>+14.4</i> | <i>+34.4</i>    | <i>+7.9</i>     |
| SFA          | 89.5g Pane Di Casa Bread<br>24.8g Butter    | 1729<br><i>+745</i>  | 45.1<br><i>+0.1</i> | 7.9<br><i>+0.1</i>  | 21.7<br><i>+20.0</i> | 13.4<br><i>+13.2</i> | <i>+5.2</i>     | <i>+0.5</i>     |
| PUFA         | 89.5g Pane Di Casa Bread<br>30.8g Margarine | 1648<br><i>+742</i>  | 45.0<br><i>+0.0</i> | 7.8<br><i>+0.0</i>  | 21.7<br><i>+20.0</i> | 5.1<br><i>+4.9</i>   | <i>+6.2</i>     | <i>+8.7</i>     |

MUFA = monounsaturated fat; PUFA = polyunsaturated fat; SFA = saturated fat; CHO = carbohydrate; italics denotes change from 0g fat

SUPPLEMENTARY DATA

**Supplementary Figure 1.** Dose-response relationships between blood glucose incremental area under the curve (iAUC) following three amounts of dietary fat added to a carbohydrate meal in 15 adults with type 1 diabetes using insulin pump therapy

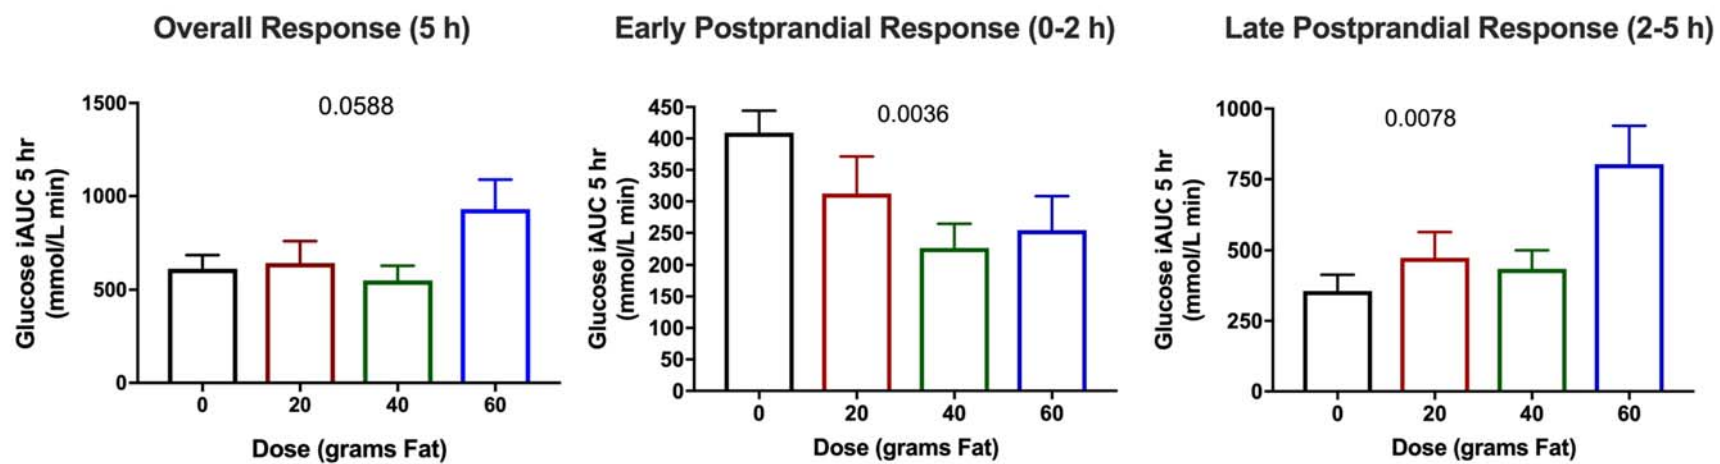

SUPPLEMENTARY DATA

**Supplementary Figure 2.** Kaplan-Meier Survival plots for frequency and timing of hypoglycemia

SUPPLEMENTARY DATA

Hypoglycemic Events by Fat Amount with ICR (n = 15)

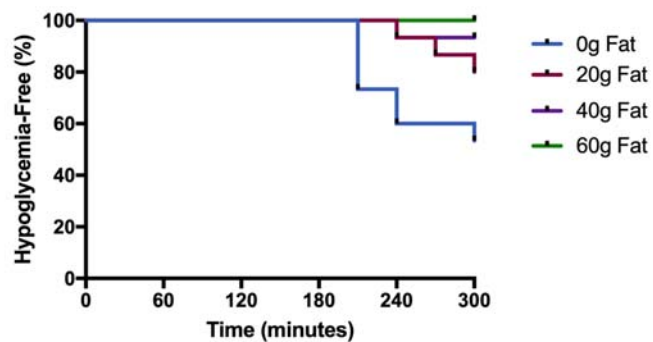

Hypoglycemic Events by Fat Type with ICR (n = 16)

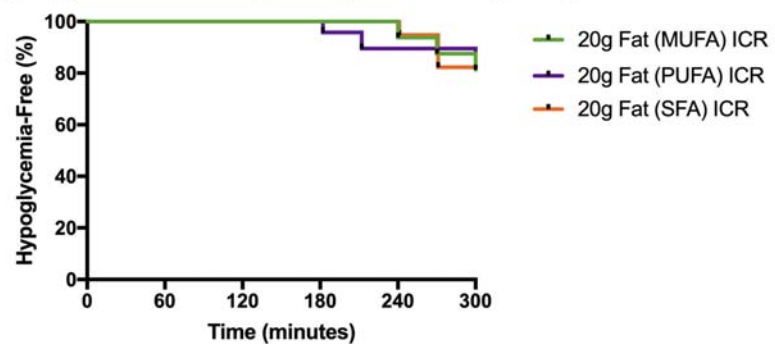

Hypoglycemic Events for ICR vs MPB (n=12)

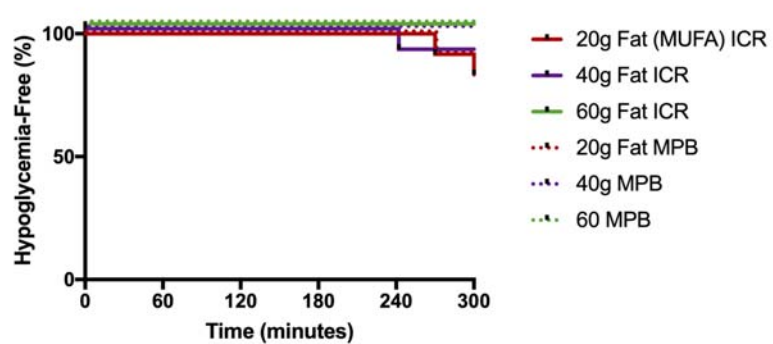

Supplement: dc190687supplementarydata.pdf [file dc190687supplementarydata.pdf]
